# Supplementary material for: In Vivo Optical Imaging of Tumor and Microvascular Response to Ionizing Radiation
Source: PubMed Central journal article supplement (PMC3425534; doi:10.1371/journal.pone.0042133), 2012-08-22
Supplement: pone.0042133.s001.pdf [file pone.0042133.s001.pdf]

| <b>GO ID</b> | <b>GO ACCESSION</b>              | <b>GO Term</b>                                                                            | <b>p-value</b> | <b>corrected p-value</b> |
|--------------|----------------------------------|-------------------------------------------------------------------------------------------|----------------|--------------------------|
| 1562         | GO:0002376                       | immune system process                                                                     | 4.0243056E-5   | 0.05097219               |
| 1664         | GO:0002478                       | antigen processing and presentation of exogenous peptide antigen                          | 7.954504E-8    | 0.00130978               |
| 1681         | GO:0002495                       | antigen processing and presentation of peptide antigen via MHC class II                   | 4.258328E-6    | 0.00876466               |
| 1690         | GO:0002504                       | antigen processing and presentation of peptide or polysaccharide antigen via MHC class II | 9.003556E-6    | 0.01347743               |
| 3841         | GO:0005578                       | proteinaceous extracellular matrix                                                        | 1.1463071E-6   | 0.00471875               |
| 4964         | GO:0006955                       | immune response                                                                           | 7.616064E-7    | 0.00418018               |
| 7096         | GO:0009897                       | external side of plasma membrane                                                          | 6.709349E-6    | 0.01104755               |
| 11793        | GO:0019882 GO:0030333            | antigen processing and presentation of exogenous antigen                                  | 6.249866E-5    | 0.06756376               |
| 11795        | GO:0019884                       | antigen processing and presentation of exogenous peptide antigen via MHC class II         | 4.1456892E-7   | 0.00341313               |
| 11797        | GO:0019886 GO:0042591 GO:0048005 | antigen processing and presentation of exogenous peptide antigen via MHC class II         | 4.258328E-6    | 0.00876466               |
| 13496        | GO:0031012                       | extracellular matrix                                                                      | 1.4476072E-6   | 0.00476723               |
| 18599        | GO:0042605 GO:0042606 GO:0042607 | peptide antigen binding                                                                   | 6.690673E-5    | 0.06756376               |
| 19421        | GO:0043487                       | regulation of RNA stability                                                               | 5.7050995E-5   | 0.06709975               |
| 19422        | GO:0043488                       | regulation of mRNA stability                                                              | 3.861347E-5    | 0.05097219               |
| 23156        | GO:0048002                       | antigen processing and presentation of peptide antigen                                    | 1.9227598E-6   | 0.00527666               |
