# Supplementary material for: In Vivo Optical Imaging of Tumor and Microvascular Response to Ionizing Radiation
Source: PubMed Central journal article supplement (PMC3425534; doi:10.1371/journal.pone.0042133), 2012-08-22
Supplement: pone.0042133.s002.pdf [file pone.0042133.s002.pdf]

| <b>GO ID</b> | <b>GO ACCESSION</b>                             | <b>GO Term</b>                               | <b>p-value</b> | <b>corrected p-value</b> |
|--------------|-------------------------------------------------|----------------------------------------------|----------------|--------------------------|
| 2597         | GO:0003779                                      | actin binding                                | 1.5735297E-4   | 0.05435988               |
| 2707         | GO:0003954                                      | NADH dehydrogenase activity                  | 1.7183235E-4   | 0.05441516               |
| 3880         | GO:0005622                                      | intracellular                                | 2.5225436E-12  | 2.8757835E-8             |
| 3890         | GO:0005634                                      | nucleus                                      | 1.512274E-4    | 0.05387633               |
| 3962         | GO:0005737                                      | cytoplasm                                    | 1.487151E-7    | 2.0014567E-4             |
| 4543         | GO:0006457 GO:0007022 <br>GO:0007024 GO:0007025 | protein folding                              | 1.5081478E-4   | 0.05387633               |
| 4914         | GO:0006891                                      | intra-Golgi vesicle-mediated transport       | 2.0809889E-4   | 0.06411882               |
| 5008         | GO:0007010                                      | cytoskeleton organization                    | 7.057107E-5    | 0.03027607               |
| 5603         | GO:0008092                                      | cytoskeletal protein binding                 | 1.5548325E-5   | 0.01042683               |
| 5637         | GO:0008137                                      | NADH dehydrogenase (ubiquinone) activity     | 1.7183235E-4   | 0.05441516               |
| 8864         | GO:0015629                                      | actin cytoskeleton                           | 7.748297E-5    | 0.03038066               |
| 12559        | GO:0022900                                      | electron transport chain                     | 5.533425E-5    | 0.02623894               |
| 12637        | GO:0030016                                      | myofibril                                    | 2.9249799E-8   | 1.1115247E-4             |
| 12638        | GO:0030017                                      | sarcomere                                    | 1.355918E-7    | 2.0014567E-4             |
| 12639        | GO:0030018                                      | Z disc                                       | 6.829969E-6    | 0.00598953               |
| 12645        | GO:0030029                                      | actin filament-based process                 | 7.4360105E-5   | 0.03027607               |
| 12652        | GO:0030036                                      | actin cytoskeleton organization              | 3.5611058E-5   | 0.01911249               |
| 14122        | GO:0031674                                      | I band                                       | 8.5683473E-7   | 9.7682E-4                |
| 19135        | GO:0043170 GO:0043283                           | macromolecule metabolic process              | 3.6882684E-5   | 0.01911249               |
| 19189        | GO:0043226                                      | organelle                                    | 8.155504E-8    | 1.5495907E-4             |
| 19190        | GO:0043227                                      | membrane-bounded organelle                   | 1.2133692E-5   | 0.00922187               |
| 19191        | GO:0043228                                      | non-membrane-bounded organelle               | 2.7885251E-5   | 0.01673164               |
| 19192        | GO:0043229                                      | intracellular organelle                      | 7.8970245E-8   | 1.5495907E-4             |
| 19194        | GO:0043231                                      | intracellular membrane-bounded organelle     | 1.159504E-5    | 0.00922187               |
| 19195        | GO:0043232                                      | intracellular non-membrane-bounded organelle | 2.7885251E-5   | 0.01673164               |
| 19251        | GO:0043292                                      | contractile fiber                            | 3.9511264E-8   | 1.12610374E-4            |
| 20156        | GO:0044237                                      | cellular metabolic process                   | 5.7539855E-5   | 0.02623894               |
| 20179        | GO:0044260 GO:0034960                           | cellular macromolecule metabolic process     | 2.4623855E-6   | 0.002552                 |
| 20186        | GO:0044267                                      | cellular protein metabolic process           | 7.359119E-5    | 0.03027607               |
| 20285        | GO:0044422                                      | organelle part                               | 6.0881366E-6   | 0.0057839                |
| 20287        | GO:0044424                                      | intracellular part                           | 8.71548E-11    | 4.967968E-7              |
| 20307        | GO:0044444                                      | cytoplasmic part                             | 7.994678E-5    | 0.03038066               |
| 20312        | GO:0044449                                      | contractile fiber part                       | 1.5800515E-7   | 2.0014567E-4             |
| 23307        | GO:0048193                                      | Golgi vesicle transport                      | 4.527842E-5    | 0.022443                 |
| 24130        | GO:0050136                                      | NADH dehydrogenase (quinone) activity        | 1.7183235E-4   | 0.05441516               |
| 25053        | GO:0051082                                      | unfolded protein binding                     | 1.3541494E-5   | 0.0096486                |
